# Supplementary material for: Transcriptomic analysis of non-model Drosophilidae reveals novel AMP candidates
Source: Research Square preprint supplement (doi:10.21203/rs.3.rs-6856057/v1), 2025-06-12

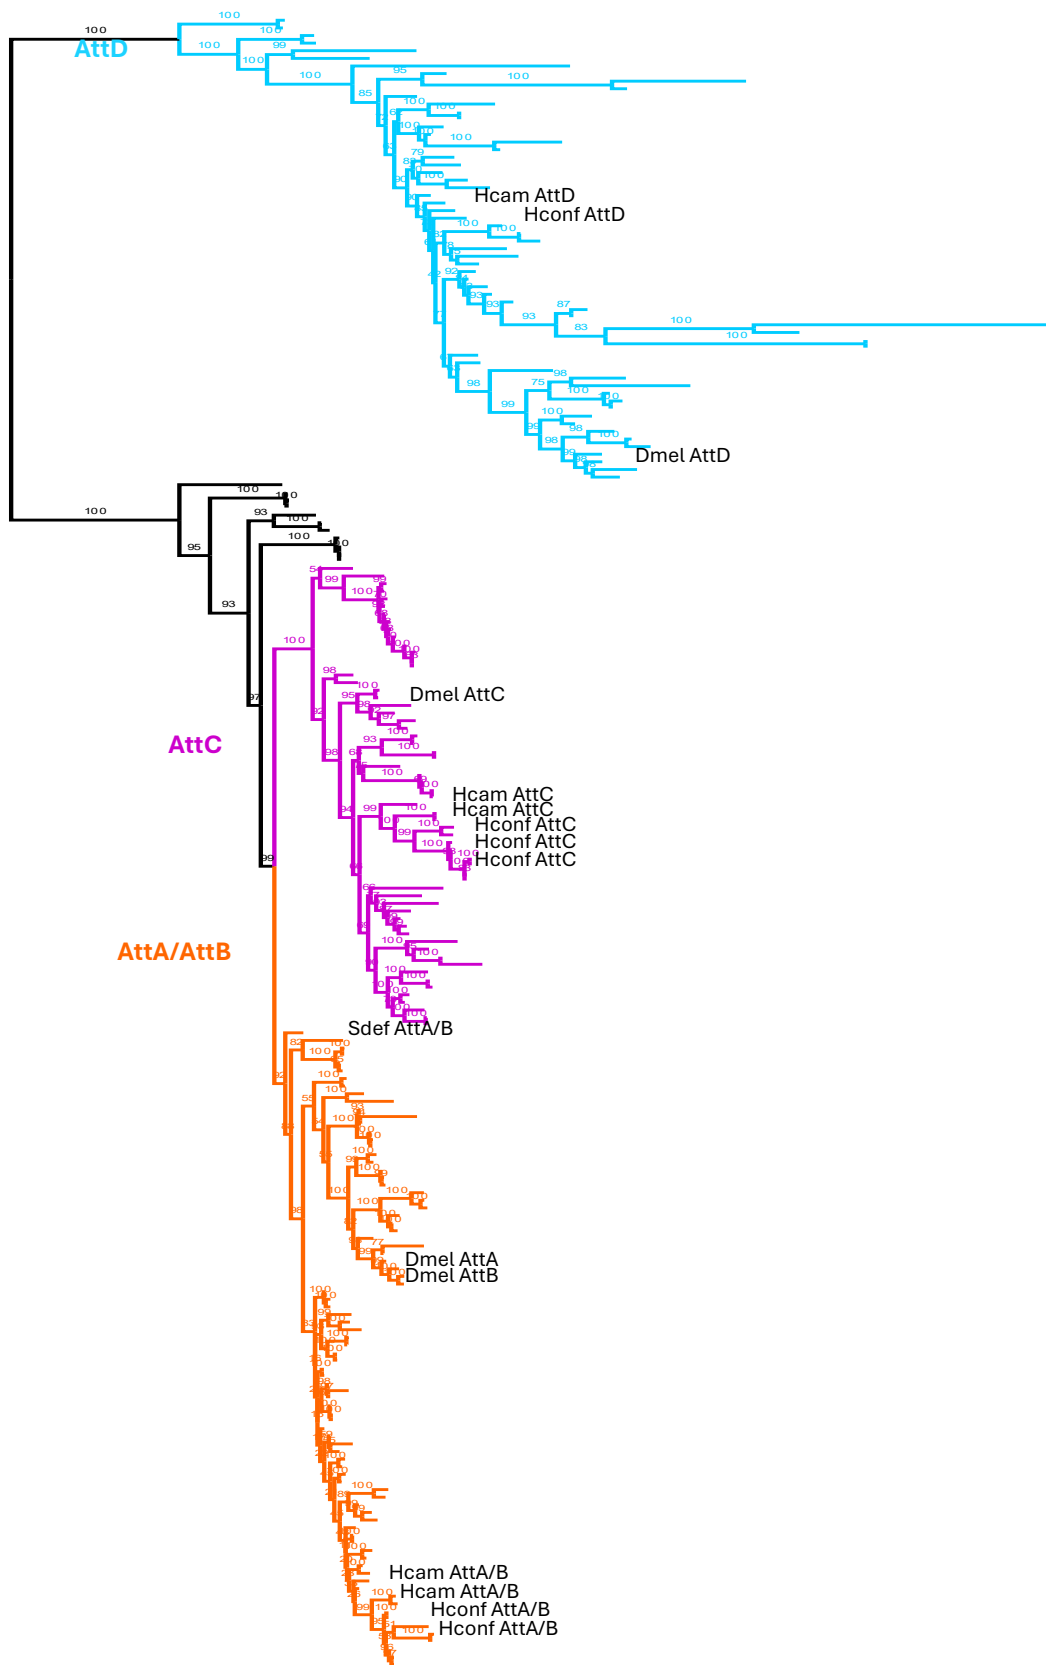

Supplement: Supplementary file [file 9e12ac810d85c07aad6151ca.pdf]
